# Supplementary material for: Self-assembly, crystal structures and properties of metal–3,4,5-tris(carboxymethoxy)benzoic acid frameworks based on polynuclear metal-hydroxyl clusters (M = Zn, Co)
Source: Royal Society of Chemistry journal article supplement (doi:10.1039/c5ra02700d), 2015-01-01
Supplement: c5ra02700d1.pdf [file c5ra02700d1.pdf]

## Supporting Information

### **Self-assembly, crystal structures and properties of metal-3,4,5-tris(carboxymethoxy)benzoic acid frameworks based on polynuclear metal-hydroxyl clusters (M = Zn, Co)**

Gaoshan Yang,<sup>a</sup> Huiliang Wen,<sup>b</sup> Chongbo Liu,<sup>\*ac</sup> Julianne Robbins,<sup>c</sup> Yunhan Wen<sup>d</sup> and

Z. John Zhang<sup>\*c</sup>

<sup>a</sup> School of Environment and Chemical Engineering, Nanchang Hangkong University,  
Nanchang 330063, China

<sup>b</sup> State Key Laboratory of Food Science and Technology, Nanchang University,  
Nanchang 330047, China

<sup>c</sup> School of Chemistry and Biochemistry, Georgia Institute of Technology, Atlanta,  
Georgia 30332, United States

<sup>d</sup> School of Chemistry and Biochemistry, The Ohio State University-Columbus,  
Columbus, Ohio 43210, United States

\*Corresponding author: Chongbo Liu, School of Environment and Chemical Engineering, Nanchang Hangkong University, Nanchang, 330063, China, E-mail: cblu2002@163.com

**1. Preparation of 3,4,5-tris(carboxymethoxy)benzoic acid (H<sub>4</sub>TCBA).** To 50 mL of water suspension of 3,4,5-trihydroxybenzoic acid (0.1 mol) was added NaOH (0.6 mol) at ambient temperature. After the reaction mixture became clear, a 50 mL solution of ClCH<sub>2</sub>COOH (0.3 mol) was added dropwisely at ca. 90 °C with vigorous stirring. After continuing the reaction for 5h, the resulting mixture was acidified with HCl to pH 2–3 and a gray product precipitated, then was filtered off, washed with 3×10 mL of deionized H<sub>2</sub>O, and air-dried. Yield 89%. MS (ESI<sup>-</sup>) m/z (M-H) 343.04. Anal. Calcd: C, 45.36; H, 3.51. Found: C, 45.72; H, 3.79. Mp: 296-297 °C. Main IR frequencies: 3483, 1708, 1500, 1419, 1331, 1139, 1030, 871, 771 cm<sup>-1</sup>. <sup>1</sup>H NMR (DMSO-d<sub>6</sub>, 400MHz) δ: 4.60 (s, 6H, CH<sub>2</sub>), 7.15 (s, 2H, ArH).

**Table S1** Selected bond lengths (Å) for complexes **1–3**

| <b>1</b>                  |          |                           |          |
|---------------------------|----------|---------------------------|----------|
| Zn(1)–O(11) <sup>#1</sup> | 2.068(2) | Zn(1)–O(11) <sup>#2</sup> | 2.068(2) |
| Zn(1)–O(12)               | 2.100(1) | Zn(1)–O(12) <sup>#3</sup> | 2.100(1) |
| Zn(1)–O(16)               | 2.115(2) | Zn(1)–O(16) <sup>#3</sup> | 2.115(2) |
| Zn(2)–O(2)                | 2.031(1) | Zn(2)–O(8) <sup>#4</sup>  | 2.087(2) |
| Zn(2)–O(10) <sup>#2</sup> | 2.096(1) | Zn(2)–O(12)               | 2.055(1) |
| Zn(2)–O(13)               | 2.213(1) | Zn(2)–O(14)               | 2.234(1) |
| Zn(3)–O(1)                | 2.061(2) | Zn(3)–O(4) <sup>#5</sup>  | 1.965(2) |
| Zn(3)–O(12)               | 1.987(1) | Zn(3)–O(15)               | 2.011(2) |
| <b>2</b>                  |          |                           |          |
| Zn(1)–O(7)                | 2.086(1) | Zn(1)–O(7) <sup>#1</sup>  | 2.086(1) |
| Zn(1)–O(12)               | 2.079(1) | Zn(1)–O(12) <sup>#1</sup> | 2.079(1) |
| Zn(1)–O(13)               | 2.215(1) | Zn(1)–O(13) <sup>#1</sup> | 2.215(1) |
| Zn(2)–O(1) <sup>#2</sup>  | 1.930(1) | Zn(2)–O(3)                | 2.401(1) |
| Zn(2)–O(5)                | 2.042(1) | Zn(2)–O(6)                | 2.484(1) |
| Zn(2)–O(7)                | 1.998(1) | Zn(2)–O(12)               | 2.099(1) |
| Zn(3)–O(2) <sup>#2</sup>  | 1.984(1) | Zn(3)–O(4) <sup>#3</sup>  | 1.972(2) |
| Zn(3)–O(11) <sup>#4</sup> | 1.974(2) | Zn(3)–O(12)               | 1.982(1) |
| <b>3</b>                  |          |                           |          |
| Co(1)–O(4) <sup>#1</sup>  | 2.069(2) | Co(1)–O(8) <sup>#2</sup>  | 2.251(2) |
| Co(1)–O(11) <sup>#3</sup> | 2.083(2) | Co(1)–O(12)               | 2.097(2) |
| Co(1)–O(13) <sup>#4</sup> | 2.043(2) | Co(1)–O(17)               | 2.158(2) |
| Co(2)–O(1)                | 2.042(2) | Co(2)–O(5) <sup>#1</sup>  | 2.132(2) |
| Co(2)–O(8) <sup>#2</sup>  | 2.129(2) | Co(2)–O(12)               | 2.031(2) |
| Co(2)–O(14)               | 2.102(2) | Co(2)–O(15)               | 2.120(2) |

|                           |          |                           |          |
|---------------------------|----------|---------------------------|----------|
| Co(3)–O(2)                | 2.049(2) | Co(3)–O(10) <sup>#3</sup> | 2.136(2) |
| Co(3)–O(12)               | 2.073(2) | Co(3)–O(13)               | 2.064(2) |
| Co(3)–O(13) <sup>#4</sup> | 2.124(2) | Co(3)–O(16)               | 2.107(2) |

Symmetry operation: **For 1**, #1  $-x + 1, -y, -z$ ; #2  $x, y, z + 1$ ; #3  $-x + 1, -y, -z + 1$ ; #4  $-x, -y + 1, -z$ ; #5  $x, y - 1, z$ ; **For 2**, #1  $-x, -y + 1, -z + 1$ ; #2  $-x + 1, y + 1/2, -z + 1/2$ ; #3  $-x + 1, -y + 1, -z + 1$ ; #4  $-x, y + 1/2, -z + 1/2$ ; **For 3**, #1  $x, y + 1, z$ ; #2  $-x + 1, -y + 1, -z + 2$ ; #3  $x, y, z - 1$ ; #4  $-x + 1, -y + 1, -z + 1$ .

**Table S2** Hydrogen bonding geometry (Å and °) for complexes **1–3**

| D–H···A                                                                                                                                                                                                | d(D–H) | d(H···A) | d(D···A) | <(DHA) |
|--------------------------------------------------------------------------------------------------------------------------------------------------------------------------------------------------------|--------|----------|----------|--------|
| <b>1</b>                                                                                                                                                                                               |        |          |          |        |
| O(12)–H(12)···O(7) <sup>#1</sup>                                                                                                                                                                       | 0.82   | 2.22     | 2.988(2) | 157.0  |
| O(14)–H(3W)···O(9) <sup>#1</sup>                                                                                                                                                                       | 0.82   | 2.26     | 2.923(2) | 138.5  |
| O(14)–H(4W)···O(13) <sup>#2</sup>                                                                                                                                                                      | 0.82   | 2.05     | 2.814(2) | 154.8  |
| O(14)–H(4W)···O(10) <sup>#1</sup>                                                                                                                                                                      | 0.82   | 2.31     | 2.844(2) | 122.9  |
| O(15)–H(5W)···O(7) <sup>#1</sup>                                                                                                                                                                       | 0.83   | 2.23     | 2.936(2) | 143.4  |
| O(15)–H(6W)···O(5) <sup>#1</sup>                                                                                                                                                                       | 0.82   | 1.94     | 2.761(2) | 174.2  |
| O(16)–H(7W)···O(8) <sup>#3</sup>                                                                                                                                                                       | 0.82   | 1.90     | 2.712(2) | 173.1  |
| O(16)–H(8W)···O(7) <sup>#4</sup>                                                                                                                                                                       | 0.83   | 1.82     | 2.633(2) | 165.0  |
| #1 $-x + 1, -y + 1, -z$ ; #2 $-x + 1, -y + 1, -z + 1$ ; #3 $-x, -y + 1, -z$ ; #4 $x, y - 1, z + 1$ .                                                                                                   |        |          |          |        |
| <b>2</b>                                                                                                                                                                                               |        |          |          |        |
| O(12)–H(12)···O(8) <sup>#1</sup>                                                                                                                                                                       | 0.82   | 2.45     | 3.023(2) | 127.6  |
| O(13)–H(1W)···O(5) <sup>#1</sup>                                                                                                                                                                       | 0.83   | 2.47     | 2.966(2) | 119.4  |
| O(13)–H(1W)···O(2) <sup>#2</sup>                                                                                                                                                                       | 0.83   | 2.47     | 3.170(3) | 142.7  |
| O(13)–H(2W)···O(11) <sup>#3</sup>                                                                                                                                                                      | 0.83   | 2.17     | 2.981(3) | 167.4  |
| #1 $-x, -y + 1, -z + 1$ ; #2 $-x, y + 1/2, -z + 1/2$ ; #3 $x, -y + 3/2, z + 1/2$ .                                                                                                                     |        |          |          |        |
| <b>3</b>                                                                                                                                                                                               |        |          |          |        |
| O(12)–H(12)···O(7) <sup>#1</sup>                                                                                                                                                                       | 0.82   | 2.44     | 3.184(3) | 151.7  |
| O(13)–H(13)···O(10) <sup>#2</sup>                                                                                                                                                                      | 0.82   | 2.36     | 2.781(3) | 112.7  |
| O(14)–H(1W)···O(15) <sup>#3</sup>                                                                                                                                                                      | 0.82   | 1.95     | 2.729(3) | 158.9  |
| O(14)–H(2W)···O(9) <sup>#4</sup>                                                                                                                                                                       | 0.83   | 1.87     | 2.609(6) | 147.9  |
| O(15)–H(3W)···O(3) <sup>#5</sup>                                                                                                                                                                       | 0.84   | 2.37     | 2.872(3) | 118.9  |
| O(15)–H(3W)···O(5) <sup>#5</sup>                                                                                                                                                                       | 0.84   | 1.98     | 2.733(3) | 149.6  |
| O(15)–H(4W)···O(6) <sup>#5</sup>                                                                                                                                                                       | 0.82   | 1.93     | 2.746(2) | 169.9  |
| O(16)–H(6W)···O(6) <sup>#5</sup>                                                                                                                                                                       | 0.83   | 2.29     | 3.081(3) | 161.2  |
| O(16)–H(6W)···O(9) <sup>#5</sup>                                                                                                                                                                       | 0.83   | 2.36     | 2.953(3) | 129.0  |
| O(17)–H(7W)···O(7) <sup>#4</sup>                                                                                                                                                                       | 0.82   | 2.12     | 2.863(3) | 150.4  |
| O(17)–H(8W)···O(18) <sup>#6</sup>                                                                                                                                                                      | 0.82   | 2.20     | 2.935(4) | 147.9  |
| O(19)–H(12W)···O(18) <sup>#7</sup>                                                                                                                                                                     | 0.83   | 2.04     | 2.709(9) | 136.7  |
| #1 $-x + 2, -y + 1, -z + 2$ ; #2 $x, y, z - 1$ ; #3 $-x + 2, -y + 2, -z + 2$ ; #4 $-x + 1, -y + 1, -z + 2$ ; #5 $-x + 2, -y + 1, -z + 2$ ; #6 $-x + 1, -y + 2, -z + 1$ ; #7 $-x + 1, -y + 1, -z + 1$ . |        |          |          |        |

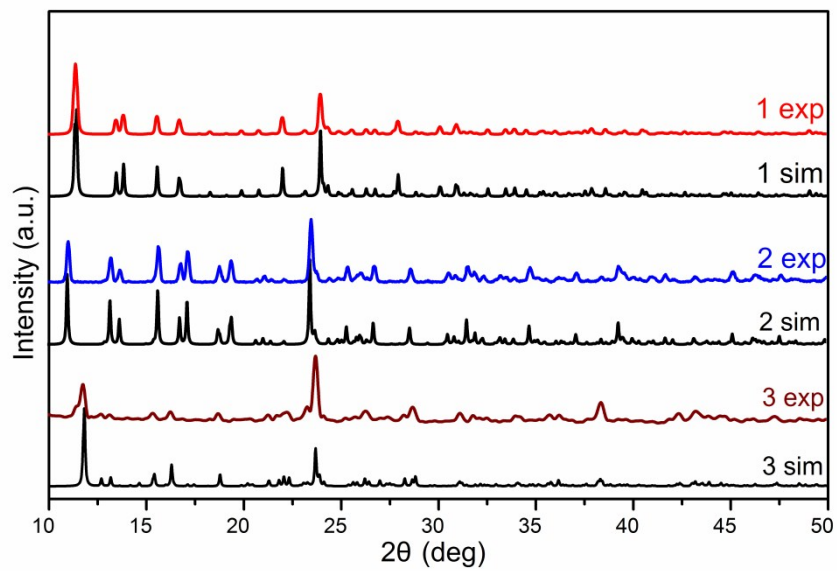

**Fig. S1** Simulated and experimental PXRD patterns of 1–3.

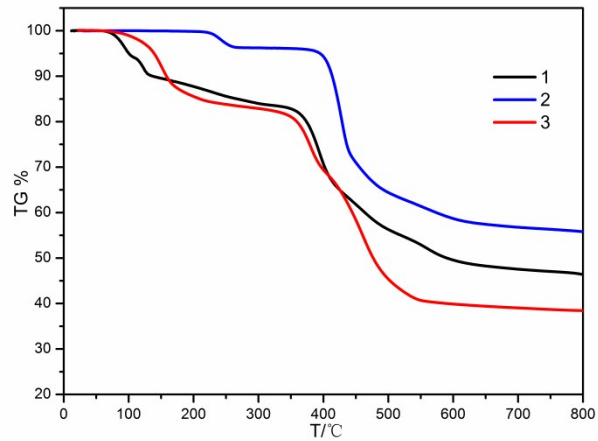

**Fig. S2** TGA curves of complexes 1–3.
